# Supplementary material for: Bioluminescence imaging of carbon monoxide in living cells based on a selective deiodination reaction
Source: Royal Society of Chemistry journal article supplement (doi:10.1039/c9an02107h), 2019-11-07
Supplement: c9an02107h1.pdf [file c9an02107h1.pdf]

## Supporting Information

### **Bioluminescence imaging of carbon monoxide in cancer cells based on a selective deiodination reaction**

Anni Wang<sup>1</sup>, Xuewei Li<sup>1</sup>, Yong Ju<sup>1</sup>, Dongying Chen<sup>2,\*</sup> and Jianzhong Lu<sup>1,\*</sup>

<sup>1</sup>*School of Pharmacy, Fudan University, 826 Zhangheng Road, Shanghai, 201203, China*

<sup>2</sup>*Shanghai Institute of Materia Medica, Chinese Academy of Sciences, 555 Zuchongzhi Road,  
Shanghai, 201203, China*

Email: jzlu@shmu.edu.cn; Tel: 0086-21-51980058

#### **1. Cell culture**

HEK 293T cells were purchased from the Committee on Type Culture Collection of Chinese Academy of Sciences. Huh7 (human liver cancers cell line) cells expressing firefly luciferase were supplied by Celcyto.

#### **2. NMR and MS spectra of D-luciferin**

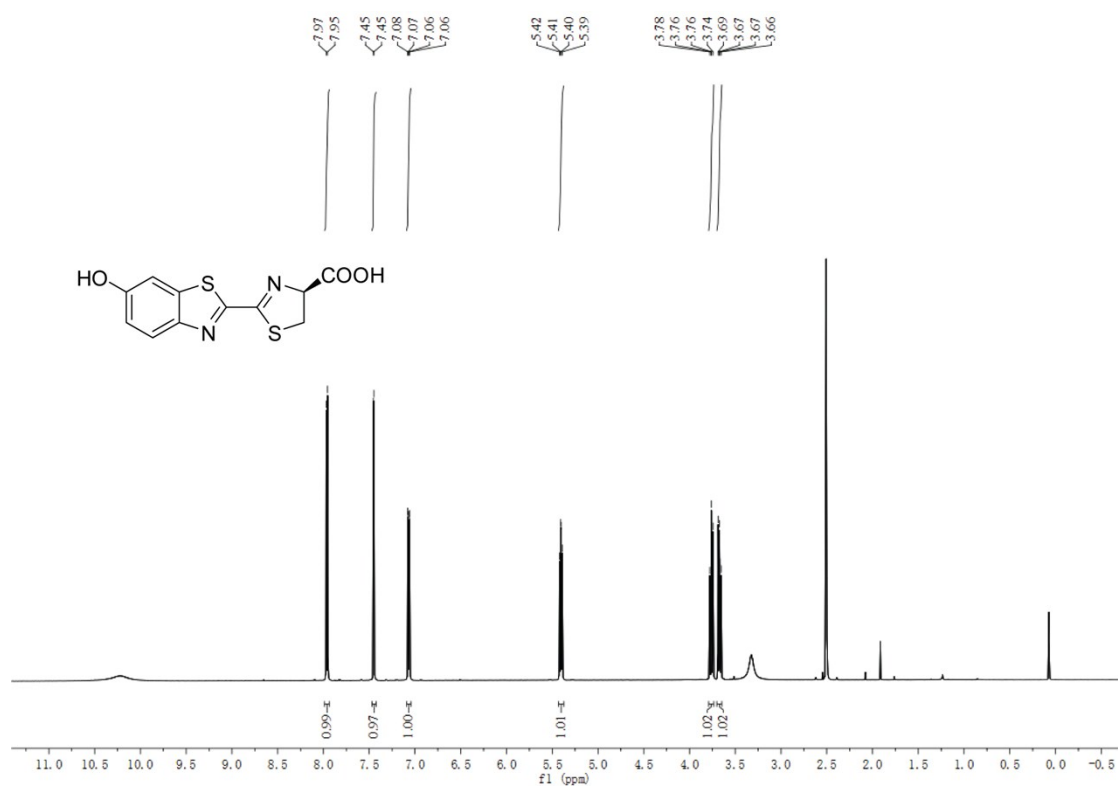

**Figure S1.** <sup>1</sup>H NMR spectrum of D-luciferin in DMSO-*d*<sub>6</sub>.

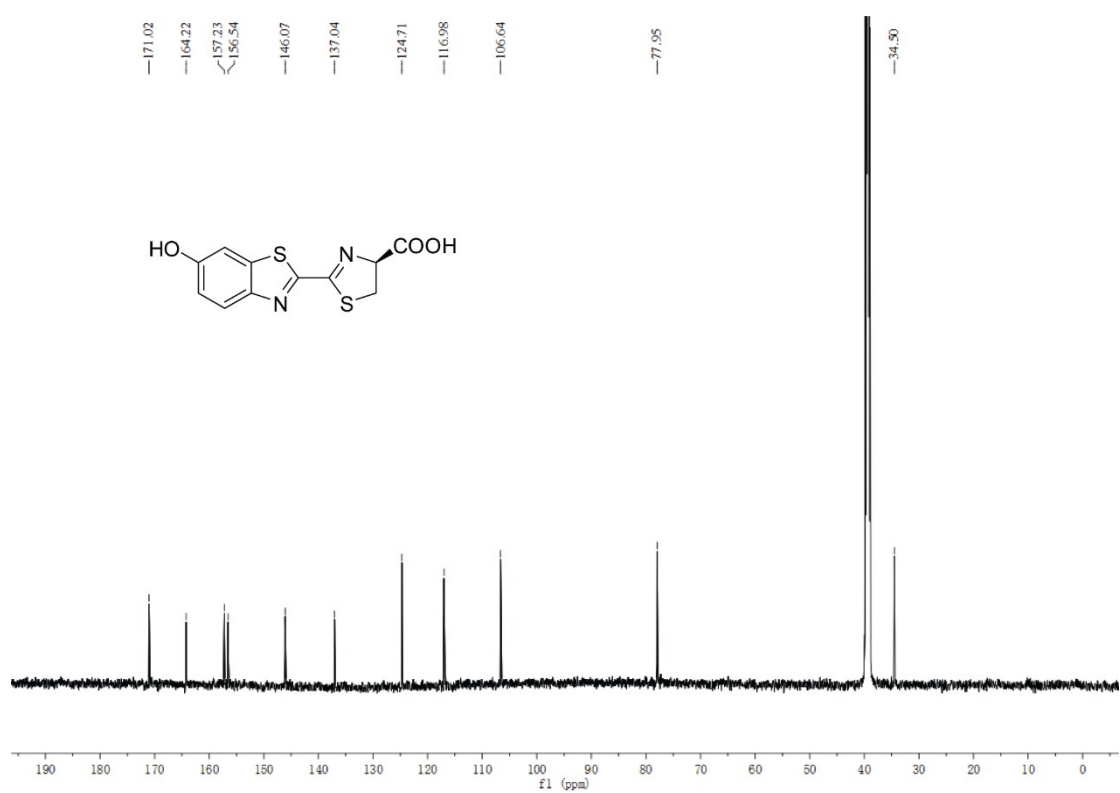

**Figure S2.** <sup>13</sup>C NMR spectrum of D-luciferin in DMSO-*d*<sub>6</sub>.

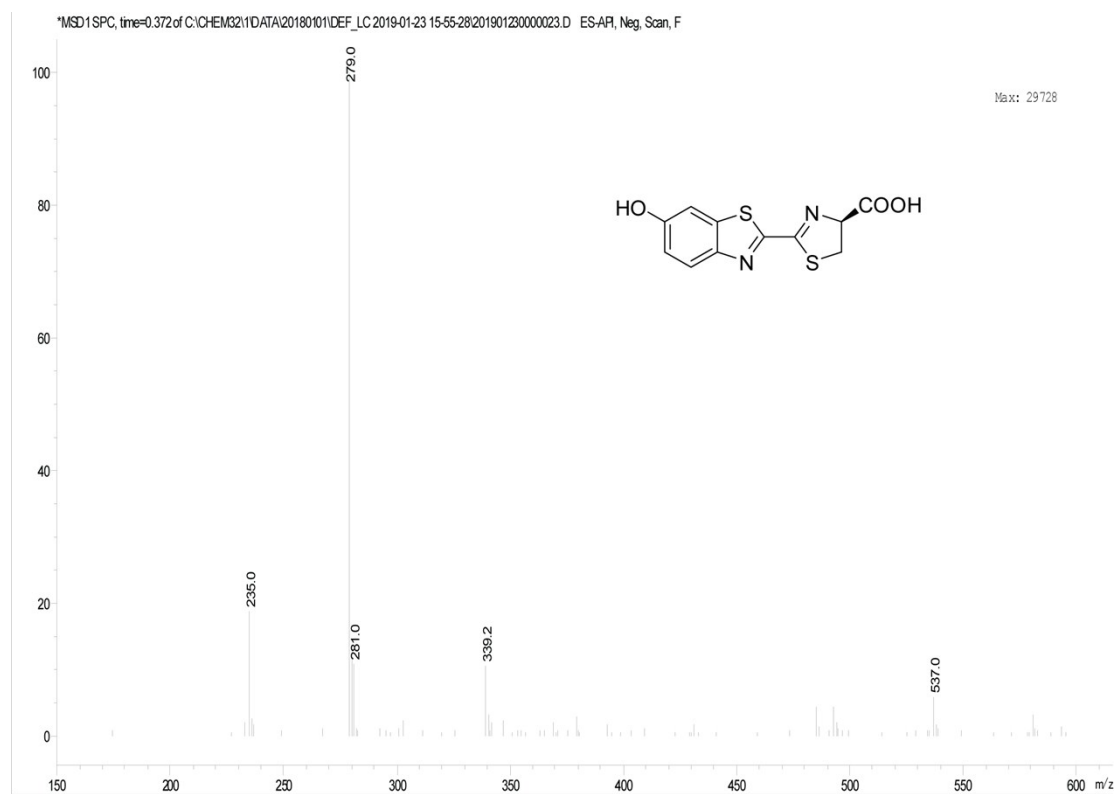

**Figure S3.** Mass spectrum of D-luciferin.

# **1. NMR and MS spectra of 7'-iodo-luciferin**

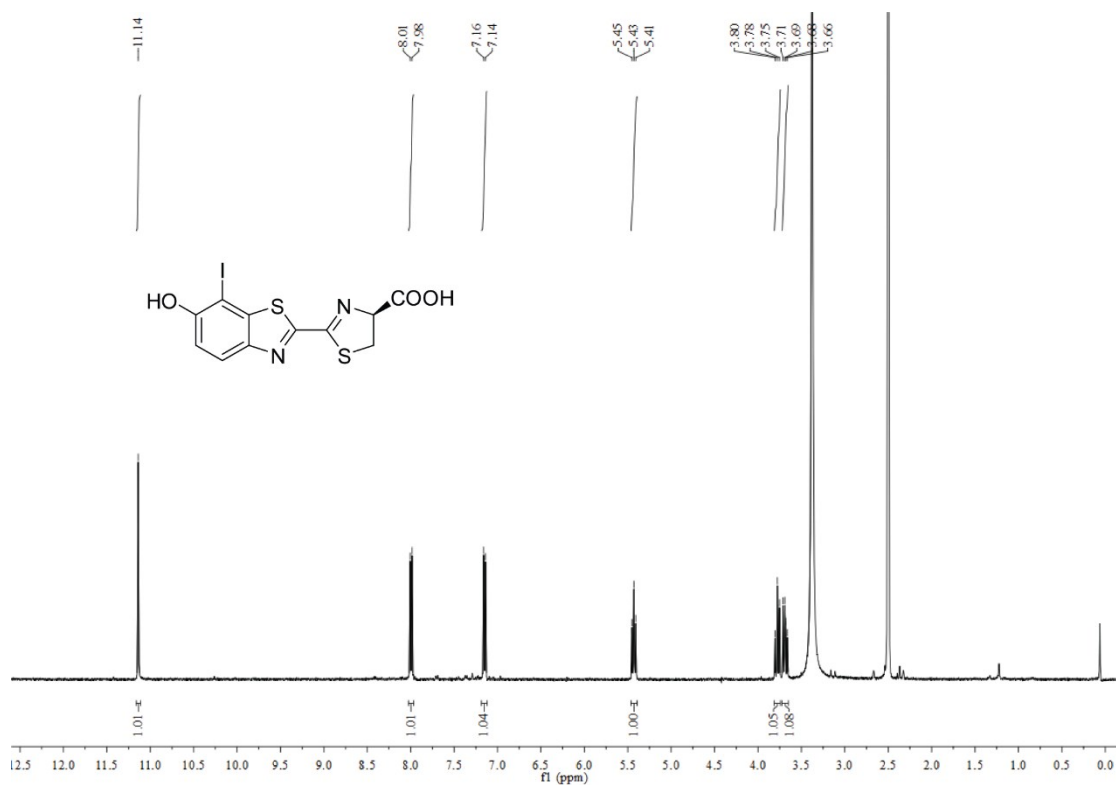

**Figure S4.** <sup>1</sup>H NMR spectrum of 7'-iodo-luciferin in DMSO-*d*<sub>6</sub>.

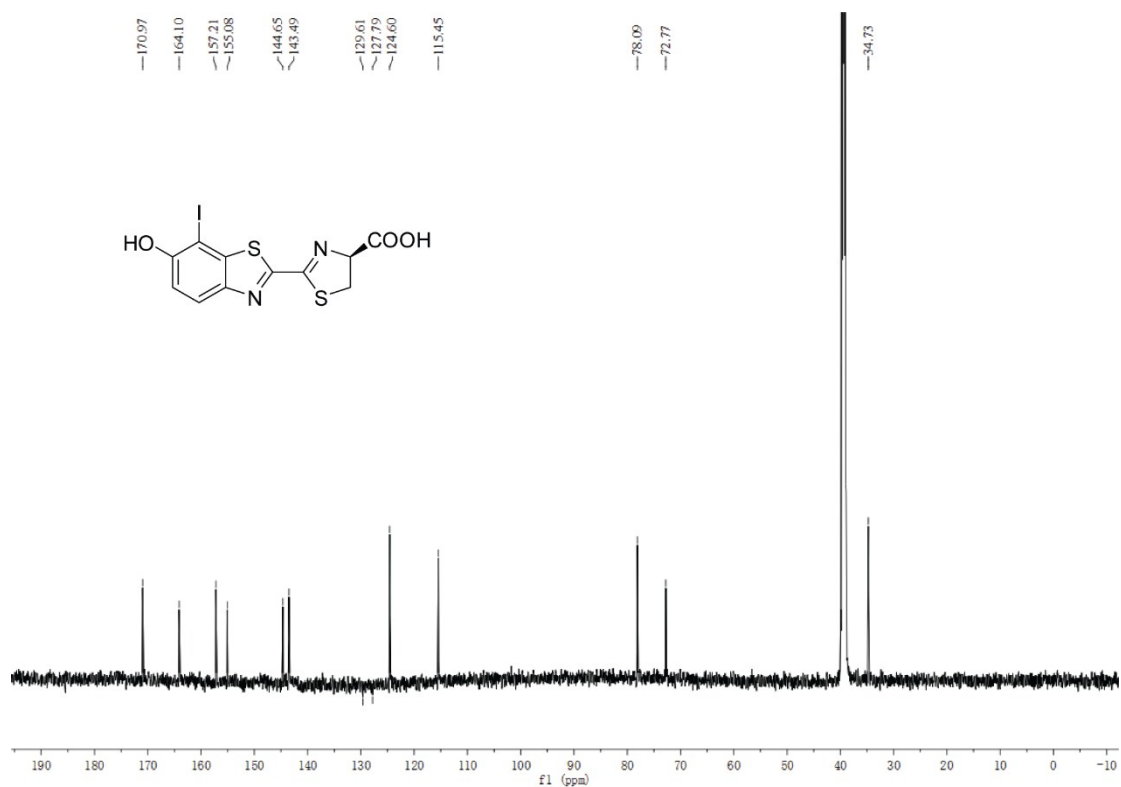

**Figure S5.** <sup>13</sup>C NMR spectrum of 7'-iodo-luciferin in DMSO-*d*<sub>6</sub>.

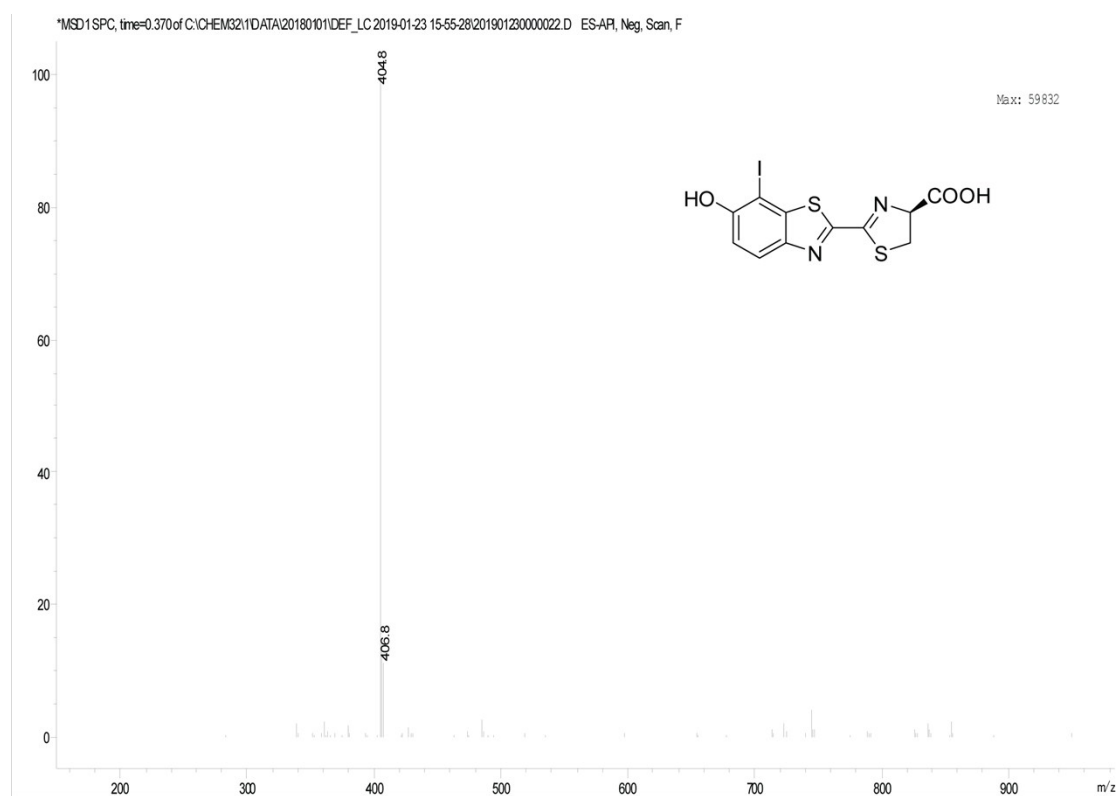

**Figure S6.** Mass spectrum of 7'-iodo-luciferin.
